# Supplementary material for: New Insight into Breast Cancer Cells Involving Drug Combinations for Dopamine and Serotonin Receptors
Source: MDPI journal article supplement (doi:10.3390/app11136082), 2021-06-30
Supplement: s1 [file s1]

# Supplementary material

**New insight in breast cancer cells involving drug combinations for dopamine and serotonin receptors**

Bárbara Costa<sup>1</sup>, Rita Matos<sup>2,3</sup>, Irina Amorim<sup>2,3</sup>, Fátima Gärtner<sup>3</sup>, Nuno Vale<sup>1,4\*</sup>

<sup>1</sup> OncoPharma Research Group, Center for Health Technology and Services Research (CINTESIS); Rua Dr. Plácido da Costa, 4200-450 Porto, Portugal; [b.c.211297@gmail.com](mailto:b.c.211297@gmail.com)

<sup>2</sup> Department of Pathology and Molecular Immunology, Institute of Biomedical Sciences Abel Salazar, University of Porto (ICBAS-UP), Rua Jorge Viterbo Ferreira 228, 4050-513 Porto, Portugal; [iamorim@ipatimup.pt](mailto:iamorim@ipatimup.pt)

<sup>3</sup> i3S, Instituto de Investigação e Inovação em Saúde, University of Porto, Rua Alfredo Allen 208, 4200-135 Porto, Portugal; [ritam@ipatimup.pt](mailto:ritam@ipatimup.pt); [fgartner@ipatimup.pt](mailto:fgartner@ipatimup.pt)

<sup>4</sup> Department of Community Medicine, Information and Health Decision Sciences (MEDCIDS), Faculty of Medicine, University of Porto, Rua Dr. Plácido da Costa, s/n, 4200-450 Porto, Portugal; [nunovale@med.up.pt](mailto:nunovale@med.up.pt)

\* Correspondence: [nunovale@med.up.pt](mailto:nunovale@med.up.pt);

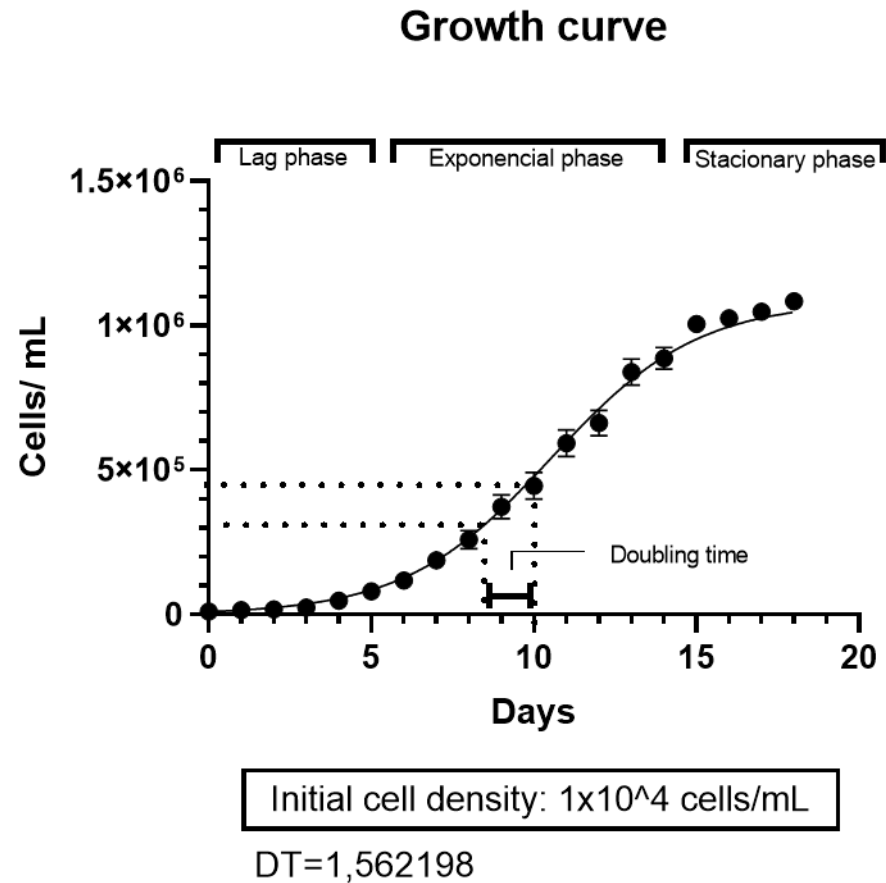

**Figure S1** – Growth curve of MCF-7 cells growth in culture. Initial cell density of  $1 \times 10^4$  cells/mL. Results are expressed as mean  $\pm$  standard error of the mean (SEM). In three independent experiments (n=3).

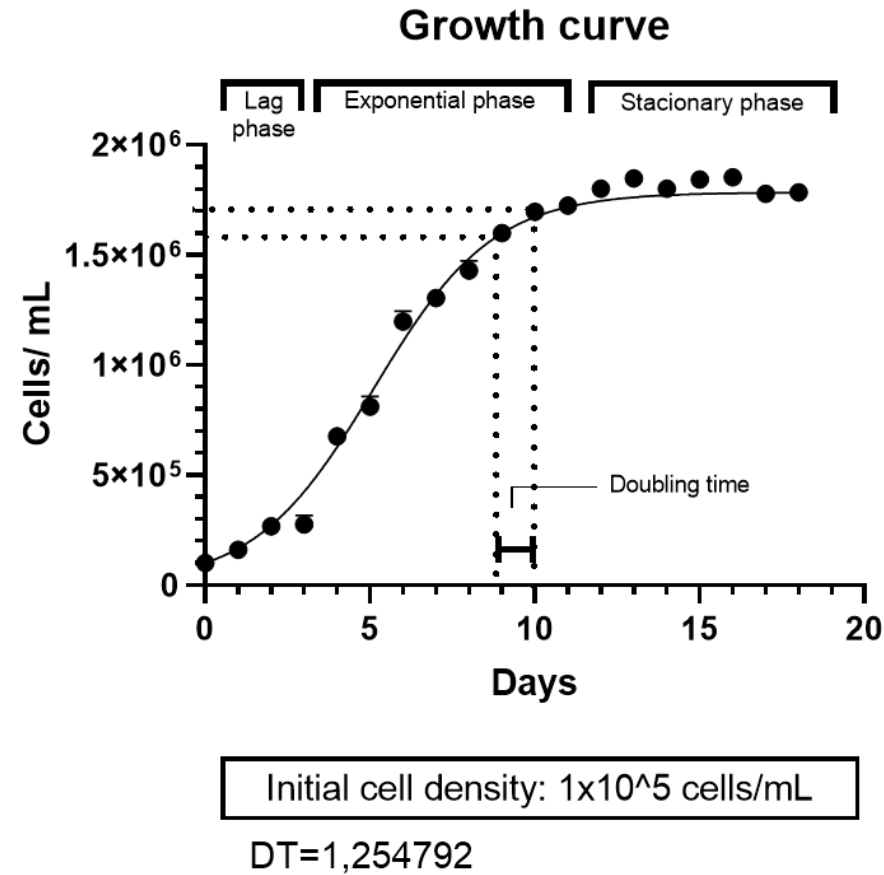

**Figure S2** – Growth curve of MCF-7 cells growth in culture. Initial cell density of  $1 \times 10^5$  cells/mL. Results are expressed as mean  $\pm$  standard error of the mean (SEM). In three independent experiments (n=3).

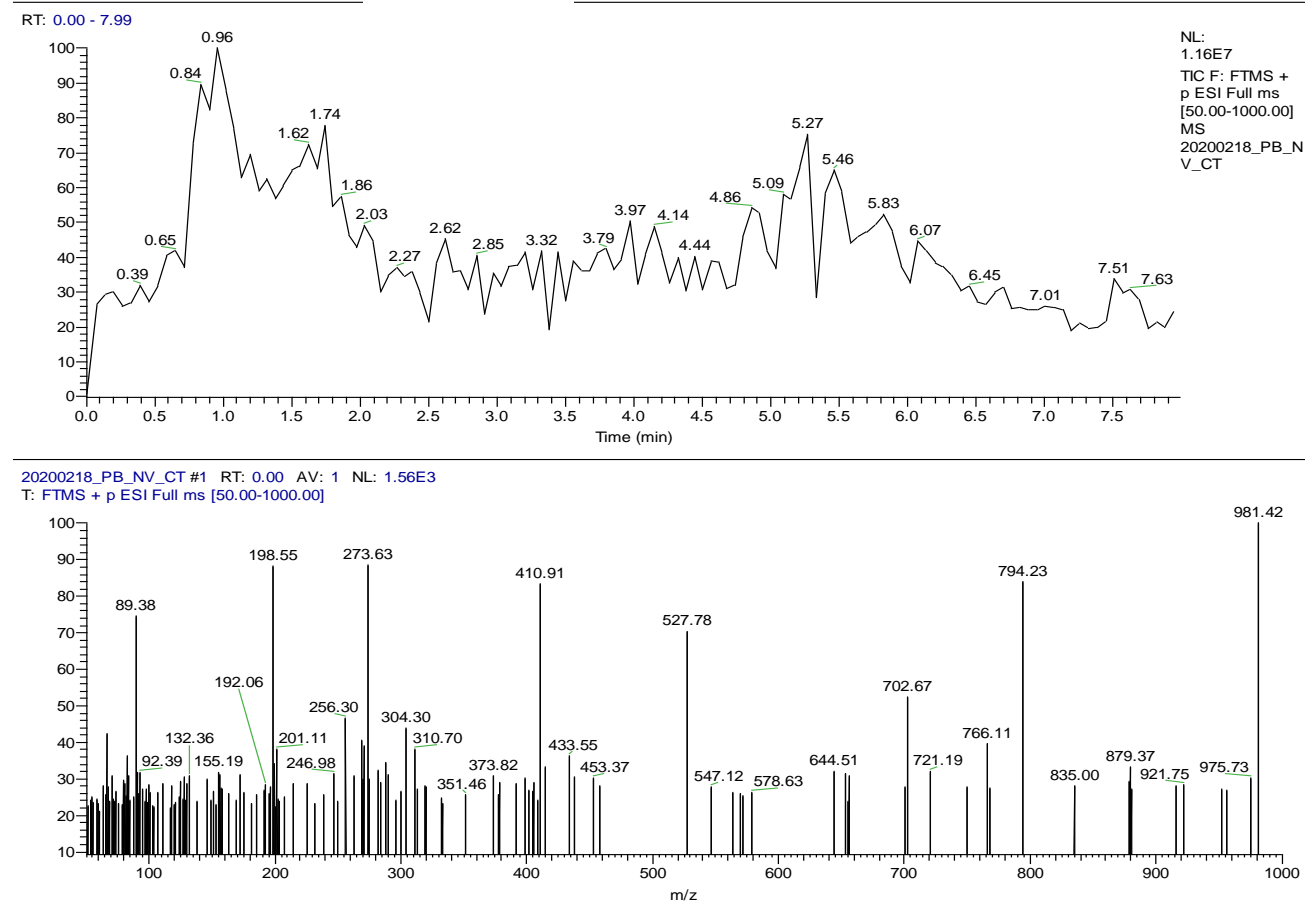

**Figure S3** – LC-MS chromatogram of the supernatant obtained from the MCF-7 cells without treatment.

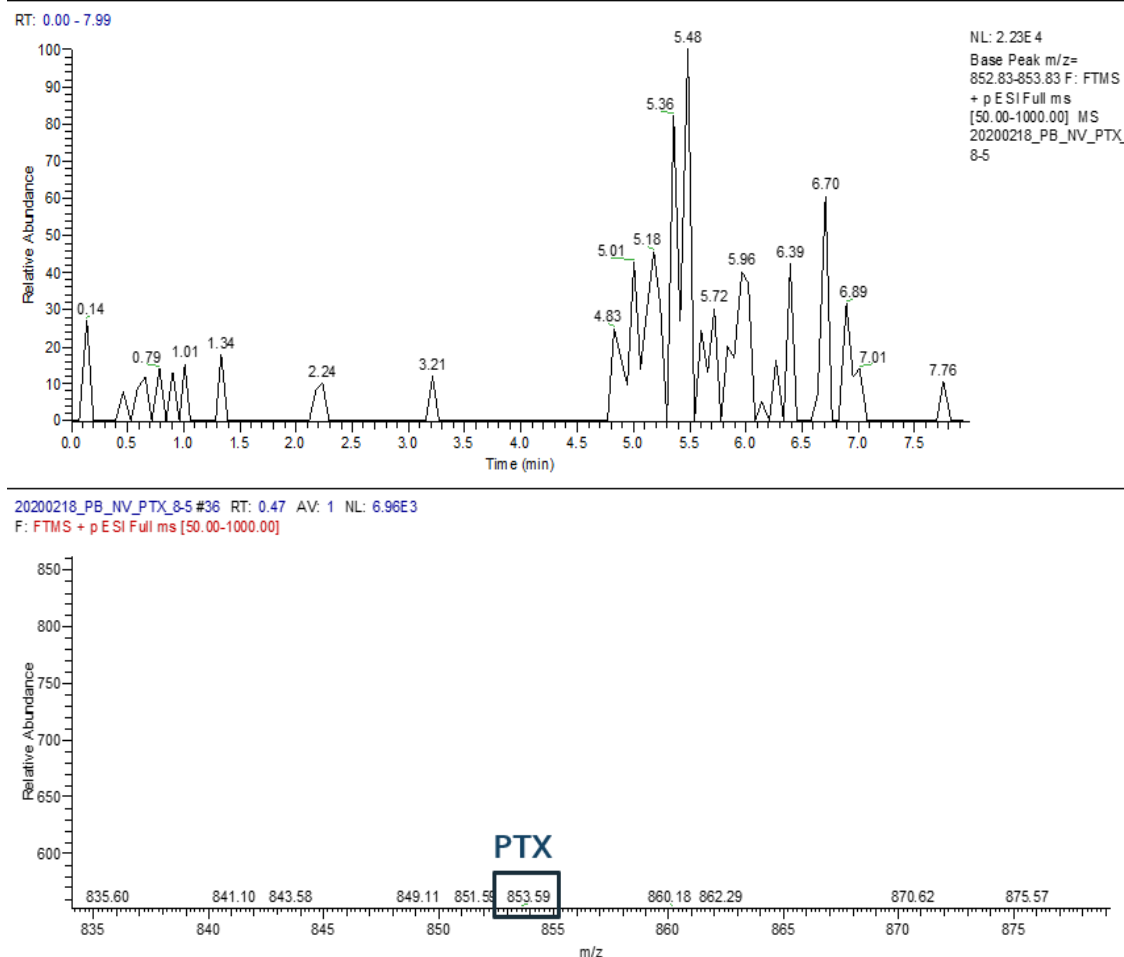

**Figure S4** – LC-MS chromatogram of the supernatant obtained from the MCF-7 cells treated only with Paclitaxel, at the IC<sub>50</sub> concentration, during 48h. The base peak is vestigial, m/z is 853.

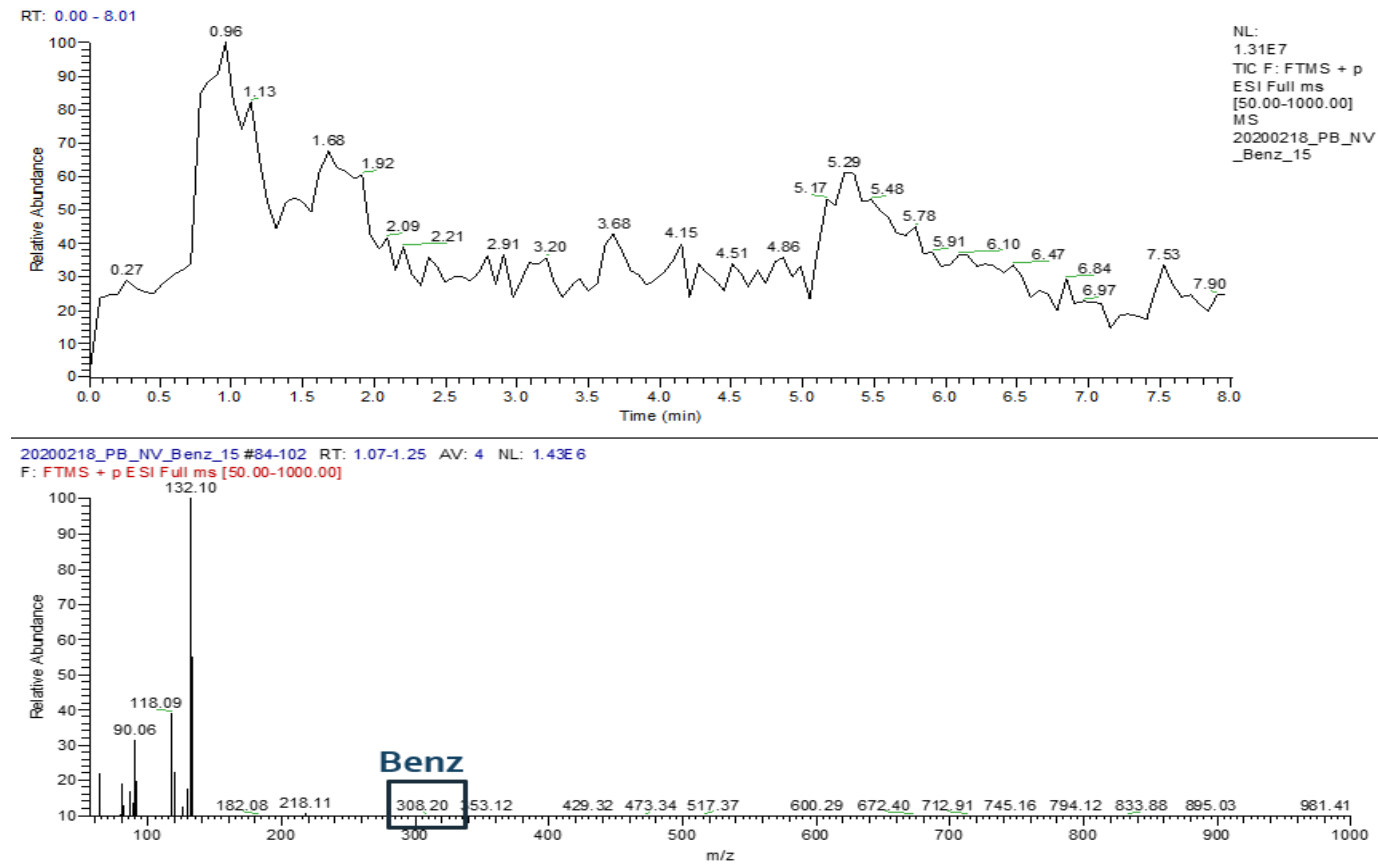

**Figure S5** - LC-MS chromatogram of the supernatant obtained from the MCF-7 cells treated with Bzotropine, at the IC<sub>50</sub> concentration, during 48h. The base peak is low, m/z is 308.20.

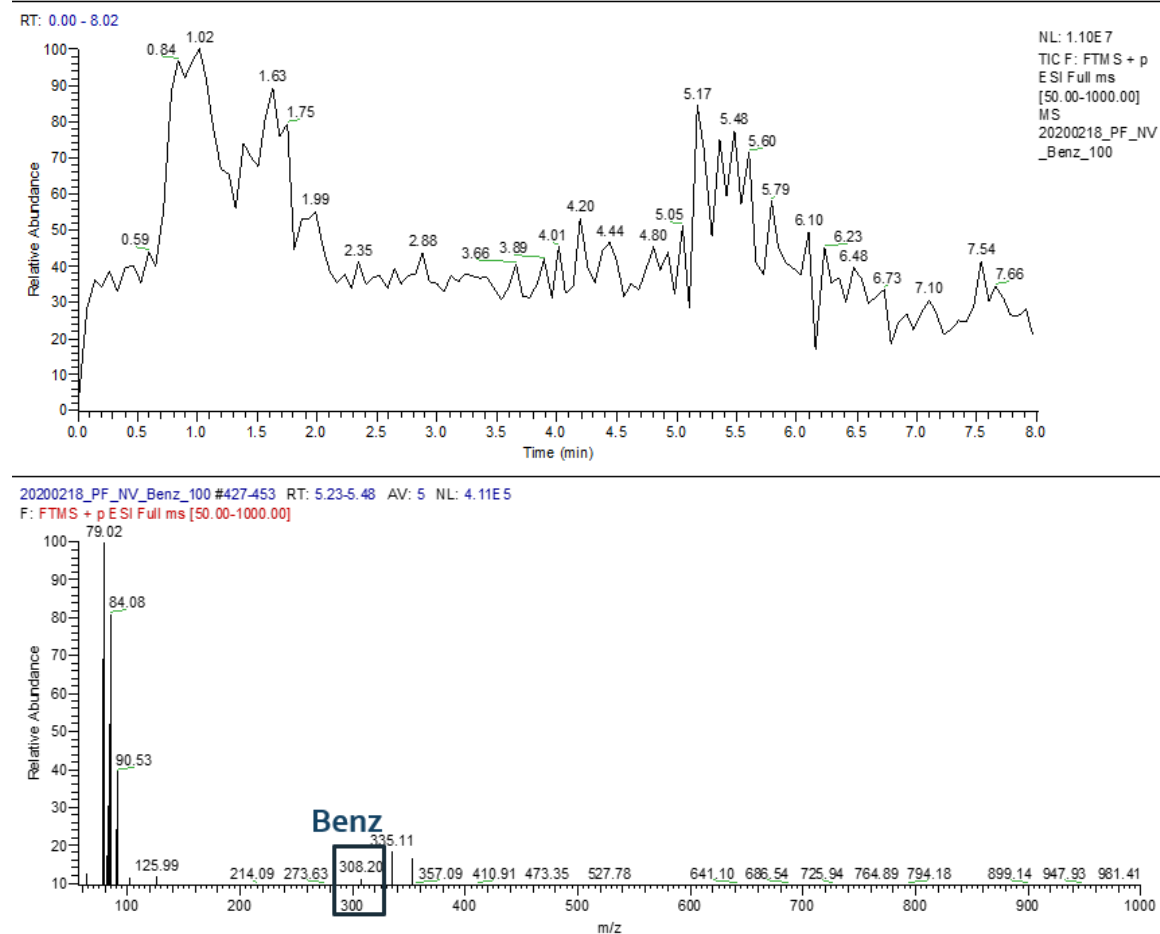

**Figure S6** - LC-MS chromatogram of the supernatant obtained from the MCF-7 cells treated with Benztropine at the highest concentration 100  $\mu$ M, during 48h. The base peak is low, m/z is 308.20.

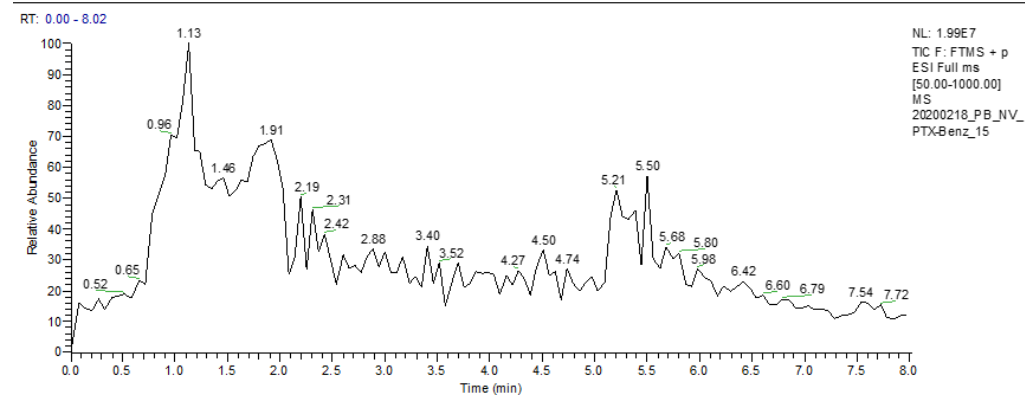

20200218\_PB\_NV\_PTX-Benz\_15 #451 RT: 5.26 AV: 1 NL: 1.34E6

F: FTMS + p ESI Full ms [50.00-1000.00]

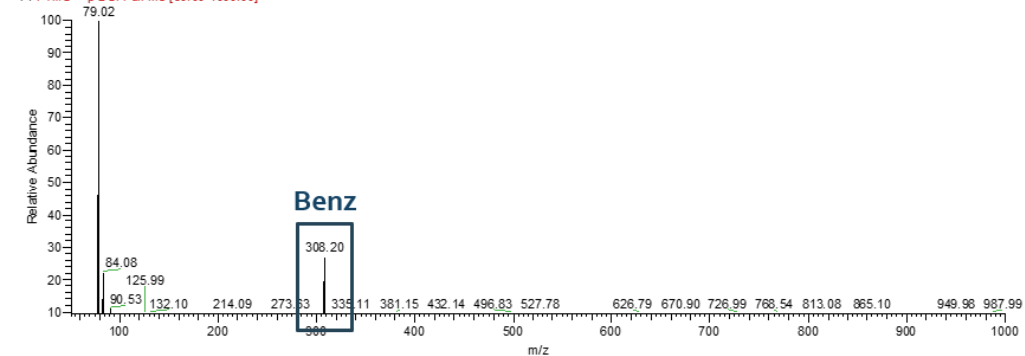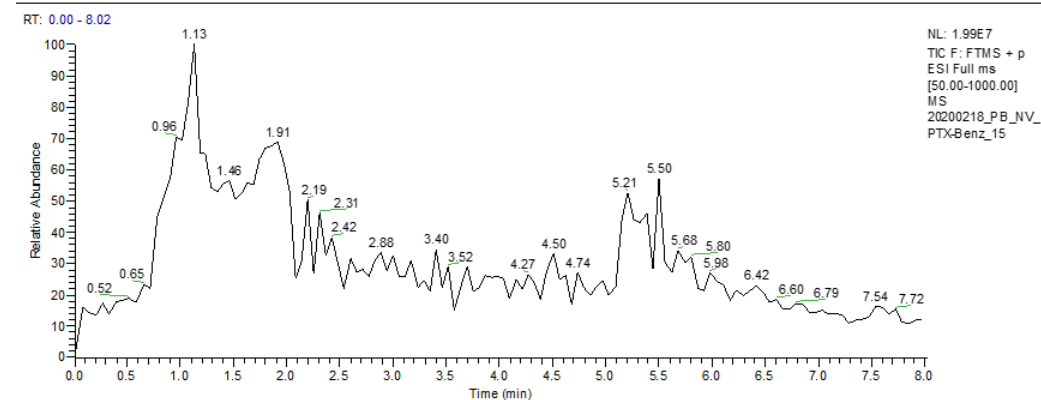

20200218\_PB\_NV\_PTX-Benz\_15 #566 RT: 6.66 AV: 1 NL: 3.17E5

F: FTMS + p ESI Full ms [50.00-1000.00]

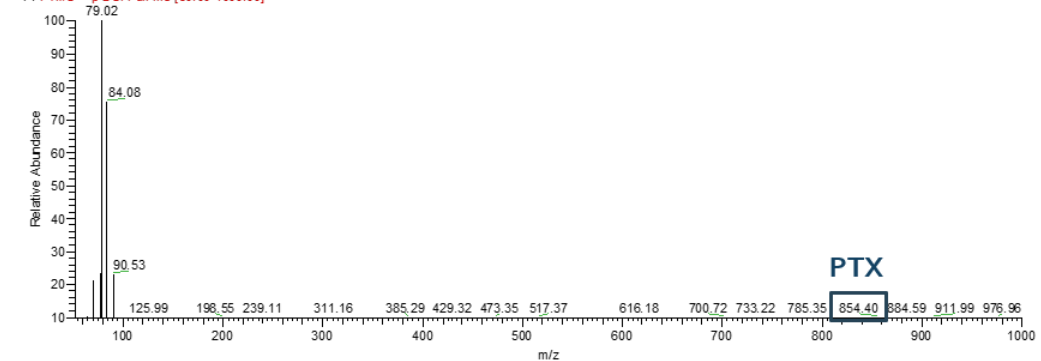

**Figure S7** - LC-MS chromatogram of the supernatant obtained from the MCF-7 cells treated with the combination of Benztropine and Paclitaxel, at the IC<sub>50</sub> concentration. The m/z is 308.20 for Benztropine (left) and 854.40 for Paclitaxel (right).



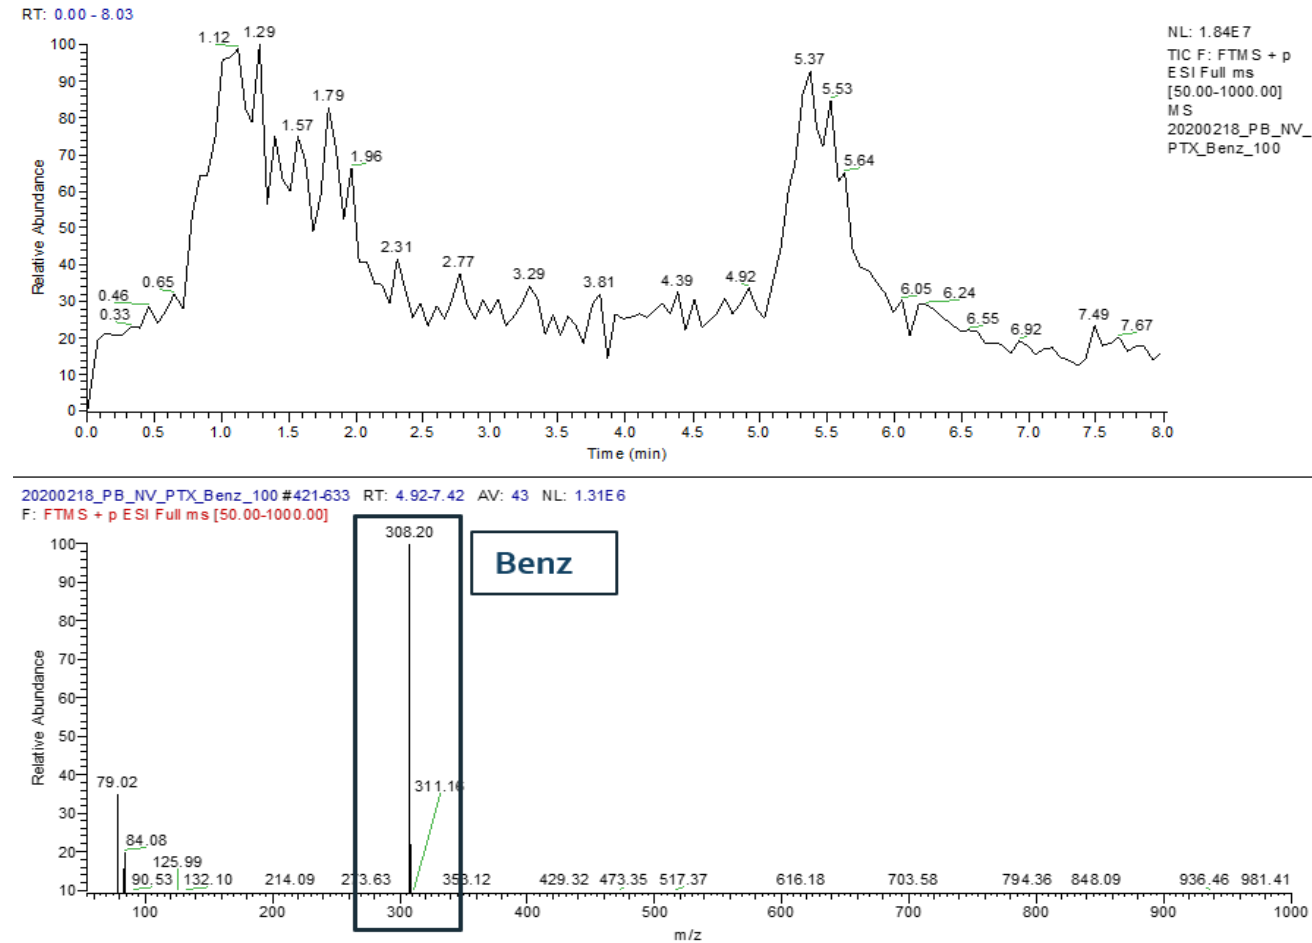

**Figure S8** - LC-MS chromatogram of the supernatant obtained from the MCF-7 cells treated with the combination of Benztropine, at the highest concentration 100  $\mu$ M, and Paclitaxel at its IC50 concentration, during 48h. The base peak is low, m/z is 308.20.

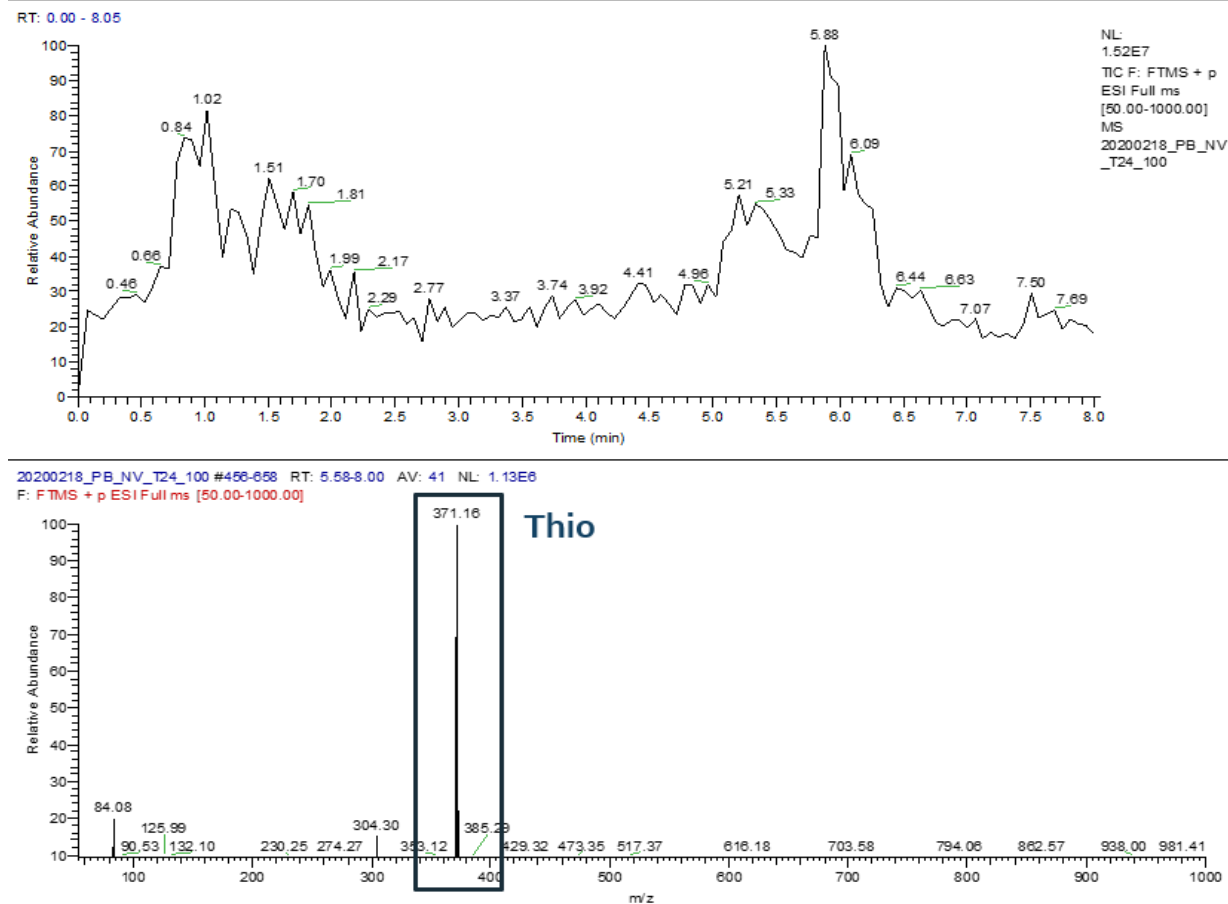

**Figure S9** - LC-MS chromatogram of the supernatant obtained from the MCF-7 cells treated with Thioridazine, after 24h of treatment. At the IC<sub>50</sub> concentration. The m/z is 371.16.

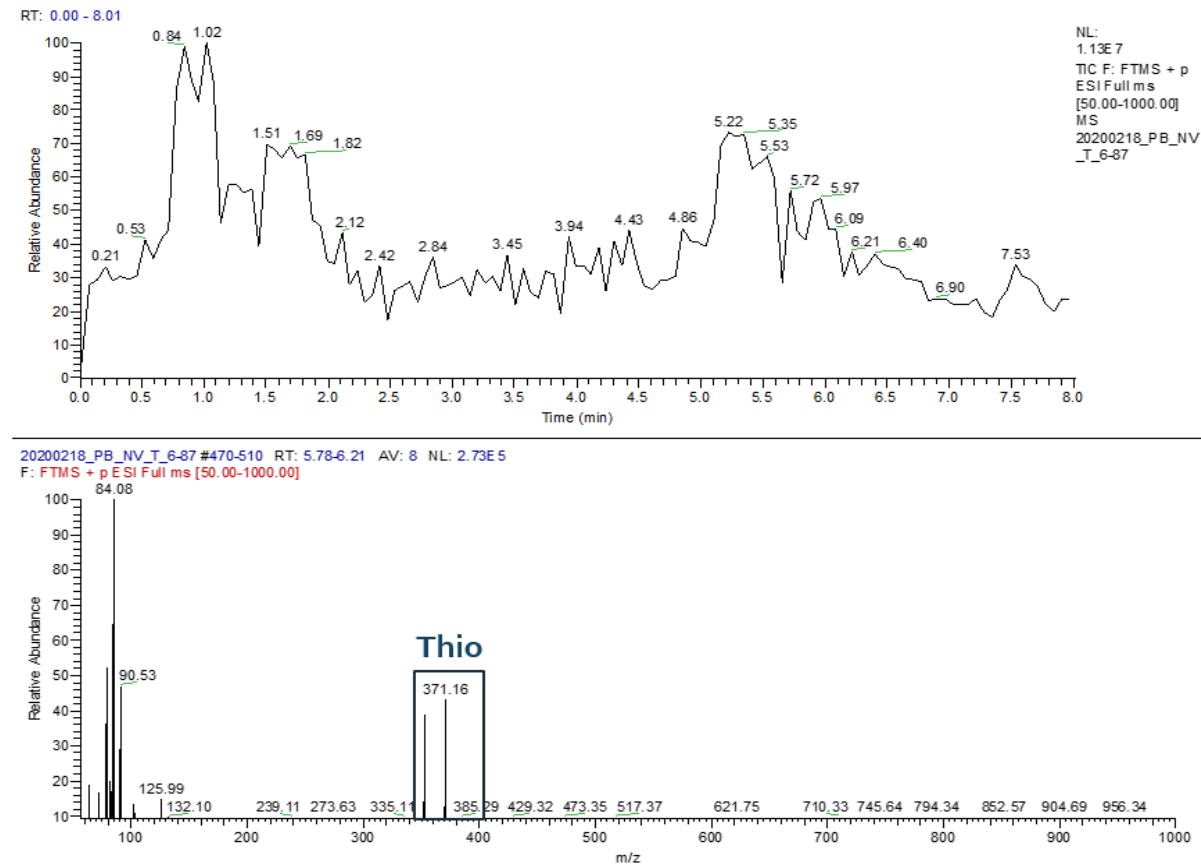

**Figure S10** - LC-MS chromatogram of the supernatant obtained from the MCF-7 cells treated with Thioridazine, at the IC<sub>50</sub> concentration. The m/z is 371.16.

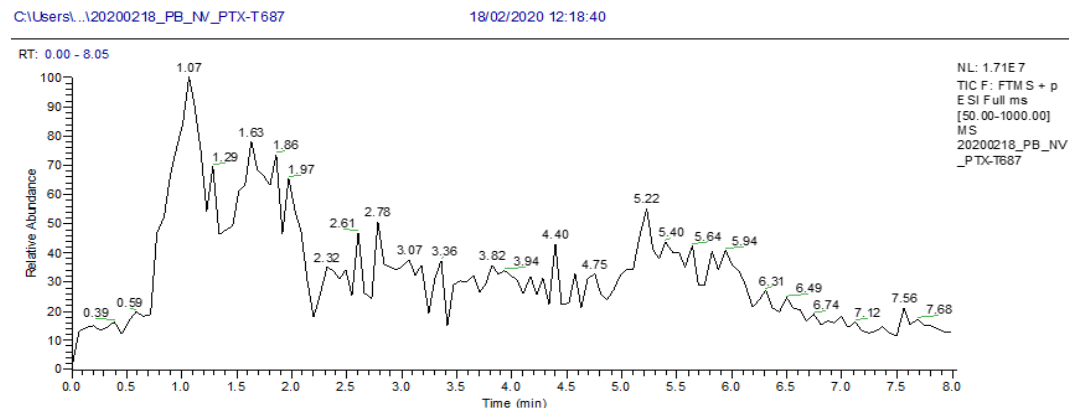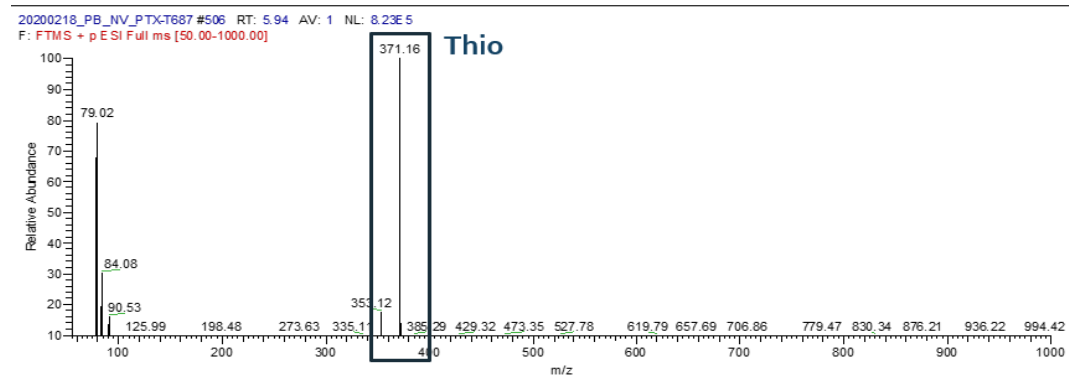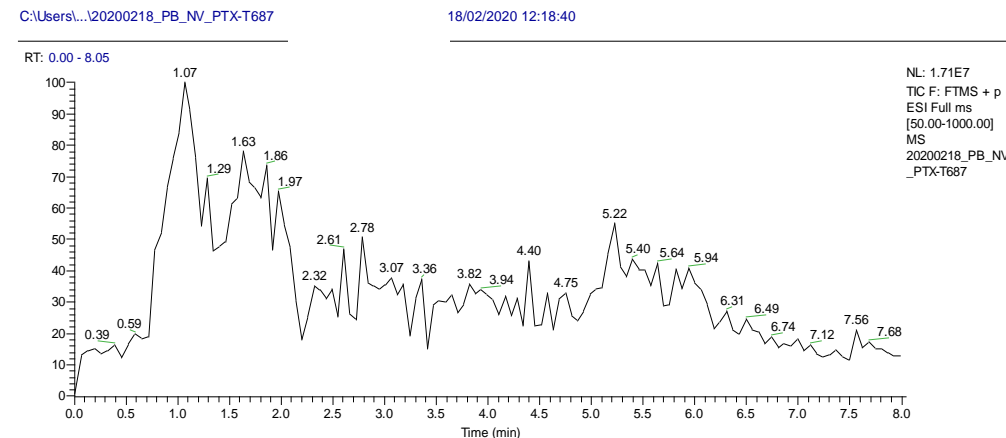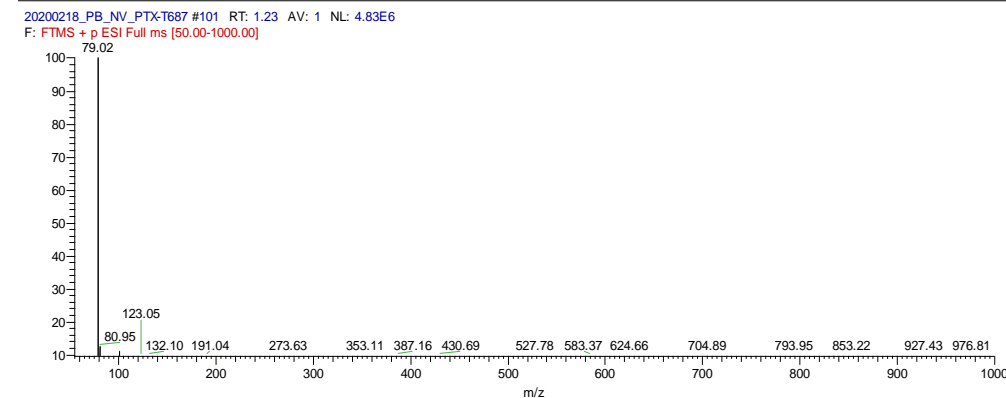

**Figure S11** - LC-MS chromatogram of the supernatant obtained from the MCF-7 cells treated with the combination of Thioridazine and Paclitaxel, at the IC50 concentration, during 48h. The m/z is 371.11 for Thioridazine (left) and 854.40 for Paclitaxel (right).
