# Supplementary material for: New Insight into Breast Cancer Cells Involving Drug Combinations for Dopamine and Serotonin Receptors
Source: MDPI journal article supplement (doi:10.3390/app11136082), 2021-06-30
Supplement: s1 [file s1]

Archive with 1 entries (1 files):
- Supplementary material.pdf
